# Supplementary material for: Knowledge, Attitude and Practices towards the Tiger Mosquito Aedes Albopictus. A Questionnaire Based Survey in Lazio Region (Italy) before the 2017 Chikungunya Outbreak
Source: MDPI journal article supplement (doi:10.3390/ijerph17113960), 2020-06-03
Supplement: s1 [file s1]

**Supplementary Table 1.** Frequency of answers to knowledge, attitude and practice questions in the three groups. For question with multiple answers (*i.e.* knowledge of *Aedes* cycle), we reported the frequency of each answer.

| domain    | question                                                                  | Value                                          | Malayalis<br>(N=204) | Punjabis<br>(N=266) | Italians<br>(N=1109) |
|-----------|---------------------------------------------------------------------------|------------------------------------------------|----------------------|---------------------|----------------------|
| knowledge | Where tiger mosquitoes lay eggs and larvae develop?                       | Don't know                                     | 0.17                 | 0.26                | 0.08                 |
|           |                                                                           | Bare ground, vegetation                        | 0.04                 | 0.12                | 0.66                 |
|           |                                                                           | Walls                                          | 0.05                 | 0.13                | 0.24                 |
|           |                                                                           | small water containers, storm drains           | 0.76                 | 0.47                | 0.89                 |
|           | What is the preferred biting time of tiger mosquitoes?                    | don't know                                     | 0.20                 | 0.07                | 0.20                 |
|           |                                                                           | Early morning or late afternoon                | 0.34                 | 0.29                | 0.31                 |
|           |                                                                           | night                                          | 0.46                 | 0.65                | 0.49                 |
|           | What diseases may be transmitted by tiger mosquitoes, if any?             | None                                           | 0.22                 | 0.33                | 0.45                 |
|           |                                                                           | Can transmit diseases but don't know which one | 0.50                 | 0.15                | 0.49                 |
|           |                                                                           | dengue, chikungunya or yellow fever            | 0.24                 | 0.09                | 0.01                 |
|           |                                                                           | malaria                                        | 0.04                 | 0.43                | 0.05                 |
| attitude  | How often are you worried by diseases that Aedes mosquitoes may transmit? | Never / rarely                                 | 0.51                 | 0.23                | 0.67                 |
|           |                                                                           | Sometimes                                      | 0.20                 | 0.50                | 0.17                 |
|           |                                                                           | very worried / extreme worried                 | 0.29                 | 0.27                | 0.16                 |
|           | How much do you feel disturbed by tiger mosquitoes bites?                 | Not at all                                     | 0.09                 | 0.06                | 0.05                 |
|           |                                                                           | Neutral/somehow                                | 0.90                 | 0.80                | 0.37                 |
|           |                                                                           | A lot/ extremely                               | 0.01                 | 0.14                | 0.58                 |
|           | How often do you feel disturbed at home by tiger mosquitoes?              | Never / rarely                                 | 0.32                 | 0.62                | 0.28                 |
|           |                                                                           | Sometimes                                      | 0.35                 | 0.24                | 0.26                 |
| practice  | what do you do to avoid Aedes bites?                                      | Very often / always                            | 0.33                 | 0.14                | 0.46                 |
|           |                                                                           | Nothing                                        | 0.58                 | 0.34                | 0.53                 |

|  |  |                                  |      |      |      |
|--|--|----------------------------------|------|------|------|
|  |  | Environmental repellents at home | 0.23 | 0.04 | 0.19 |
|  |  | personal repellents              | 0.15 | 0.4  | 0.28 |
|  |  | Other                            | 0.05 | 0.23 | 0.01 |
